# Supplementary material for: A Positive Causal Relationship between Noodle Intake and Metabolic Syndrome: A Two-Sample Mendelian Randomization Study
Source: MDPI journal article supplement (doi:10.3390/nu15092091), 2023-04-26

Table S1. Factor-loading values of the predefined 29 food groups in each dietary pattern.

|                                      | Korean balanced<br>diet | Plant-based<br>diet | Western-style<br>diet | Rice-main<br>diet |
|--------------------------------------|-------------------------|---------------------|-----------------------|-------------------|
| Rice                                 | -3                      | -7                  | 4                     | 93 *              |
| Whole grain                          | 9                       | -4                  | -2                    | -93 *             |
| Noodles                              | 2                       | 2                   | 62 *                  | 3                 |
| Bread                                | -7                      | 35                  | 53 *                  | -5                |
| Cookies                              | -7                      | 31                  | 30                    | 6                 |
| Beans                                | 32                      | 48 *                | 3                     | 2                 |
| Potatoes                             | 24                      | 50 *                | 5                     | -3                |
| Kimchi                               | 50 *                    | 1                   | -1                    | -3                |
| Eggs                                 | 8                       | 43 *                | 15                    | 5                 |
| Fast food                            | -4                      | 15                  | 76 *                  | -4                |
| Green vegetables                     | 67 *                    | 42 *                | -2                    | -2                |
| White vegetables                     | 70 *                    | 29                  | 2                     | 2                 |
| Mushrooms                            | 49 *                    | 35                  | -6                    | -4                |
| Fatty fish                           | 53 *                    | 23                  | 11                    | 0                 |
| White fish                           | 66 *                    | 17                  | 12                    | 0                 |
| Crab                                 | 49 *                    | 4                   | 19                    | 1                 |
| Processed meat                       | 18                      | 15                  | 6                     | -1                |
| Red meat                             | 46 *                    | -7                  | 41 *                  | 8                 |
| Chicken                              | 33                      | -6                  | 39                    | 4                 |
| Soup                                 | 16                      | 4                   | 65 *                  | -5                |
| Seaweed                              | 44 *                    | 41 *                | -2                    | -4                |
| Milk                                 | 11                      | 49 *                | 2                     | 0                 |
| Beverages                            | 20                      | 32                  | 6                     | 2                 |
| Coffee                               | 10                      | -1                  | 19                    | 15                |
| Tea                                  | 14                      | -8                  | 24                    | 14                |
| Fruit                                | 19                      | 48 *                | -6                    | -6                |
| Pickles                              | 50 *                    | -1                  | 4                     | 2                 |
| Alcohol                              | 18                      | -28                 | 16                    | 6                 |
| Nuts                                 | -2                      | 50 *                | 6                     | -5                |
| Variance explained<br>by each factor | 3.545                   | 2.487               | 2.291                 | 1.799             |

Values are factor-loading values, and their absolute values are higher than 0.4, indicating the principal component of each diet. The principal components of the food groups are flagged by an '\*', and the name of each dietary pattern was assigned from the flagged principal food groups.

Table S2. Instrumental variables for metabolic syndrome according to total noodle intake.

| SNP         | CHR | Gene name       | Effect allele | Other allele | Beta value | Standard error | P value for beta |
|-------------|-----|-----------------|---------------|--------------|------------|----------------|------------------|
| rs9661471   | 1   | Unknown         | C             | T            | 0.064458   | 0.03623        | 4.24E-05         |
| rs3000992   | 1   | Unknown         | G             | A            | 0.120903   | 0.06244        | 8.16E-06         |
| rs12024761  | 1   | Unknown         | A             | G            | 0.063333   | 0.03471        | 2.55E-05         |
| rs320390    | 1   | RPS6KC1         | A             | G            | 0.051153   | 0.02798        | 2.64E-05         |
| rs9661882   | 1   | ENSG00000235152 | C             | T            | 0.097951   | 0.04907        | 4.16E-06         |
| rs72780422  | 2   | LINC01250       | T             | C            | -0.06419   | 0.03138        | 2.46E-06         |
| rs12714235  | 2   | PLB1            | T             | G            | -0.04735   | 0.02673        | 4.51E-05         |
| rs17037700  | 2   | ENSG00000282890 | G             | C            | 0.059185   | 0.03306        | 3.74E-05         |
| rs17204247  | 2   | ENSG00000237844 | G             | A            | 0.058046   | 0.03108        | 1.61E-05         |
| rs57481778  | 2   | ENSG00000237844 | G             | C            | 0.053846   | 0.0297         | 3.17E-05         |
| rs12105509  | 2   | ENSG00000287621 | A             | G            | 0.089198   | 0.04762        | 1.58E-05         |
| rs13006623  | 2   | KLF7            | A             | G            | 0.079543   | 0.04173        | 1.09E-05         |
| rs883846    | 3   | CNTN4           | A             | G            | 0.051924   | 0.02747        | 1.39E-05         |
| rs62243145  | 3   | RBMS3           | C             | A            | -0.05291   | 0.02838        | 1.77E-05         |
| rs1440494   | 3   | RBMS3           | C             | T            | 0.162266   | 0.08682        | 1.68E-05         |
| rs10935617  | 3   | Unknown         | A             | G            | 0.067071   | 0.03617        | 1.87E-05         |
| rs17492873  | 3   | ENSG00000289524 | A             | G            | 0.060698   | 0.03379        | 3.49E-05         |
| rs73154306  | 3   | RSRC1           | T             | C            | -0.09135   | 0.04435        | 2.12E-06         |
| rs2886486   | 3   | Unknown         | T             | C            | 0.081347   | 0.0444         | 2.36E-05         |
| rs57322709  | 4   | ENSG00000251488 | T             | A            | 0.130977   | 0.0733         | 3.89E-05         |
| rs13144423  | 4   | LOC105377565    | G             | C            | 0.076276   | 0.04274        | 3.93E-05         |
| rs34671451  | 4   | Unknown         | G             | A            | -0.07998   | 0.04434        | 3.29E-05         |
| rs78572745  | 5   | HSD17B4         | A             | G            | 0.207634   | 0.11           | 1.37E-05         |
| rs9505355   | 6   | Unknown         | G             | A            | -0.22069   | 0.1238         | 4.03E-05         |
| rs11753123  | 6   | Unknown         | T             | A            | 0.198932   | 0.103          | 8.65E-06         |
| rs9373060   | 6   | TARID           | G             | T            | -0.07068   | 0.03619        | 6.87E-06         |
| rs317726    | 7   | CPVL            | T             | C            | -0.0535    | 0.0303         | 4.75E-05         |
| rs7796785   | 7   | CD36            | G             | A            | -0.18509   | 0.09995        | 2.02E-05         |
| rs2740968   | 8   | CSMD1           | G             | T            | 0.05038    | 0.0274         | 2.14E-05         |
| rs114621778 | 8   | POP1            | C             | T            | -0.15833   | 0.08951        | 4.66E-05         |
| rs2297324   | 9   | GLIS3           | G             | A            | 0.089198   | 0.04988        | 3.77E-05         |
| rs16938533  | 9   | Unknown         | A             | T            | 0.05038    | 0.02753        | 2.55E-05         |
| rs12555197  | 9   | FRMD3           | G             | A            | -0.06596   | 0.03501        | 1.45E-05         |
| rs11103757  | 9   | ENSG00000227958 | G             | A            | 0.05038    | 0.02772        | 3.05E-05         |
| rs73268668  | 10  | Unknown         | T             | A            | 0.074816   | 0.03927        | 1.19E-05         |
| rs1816002   | 10  | ADAMTS14        | T             | C            | 0.054613   | 0.02657        | 2.40E-06         |
| rs7082586   | 10  | ADAMTS14        | A             | G            | 0.054613   | 0.02856        | 1.08E-05         |

|            |    |                 |   |   |          |         |          |
|------------|----|-----------------|---|---|----------|---------|----------|
| rs12798342 | 11 | PSMA1           | A | T | -0.0751  | 0.03438 | 4.93E-07 |
| rs10501153 | 11 | PRR5L           | T | C | 0.068928 | 0.03774 | 2.71E-05 |
| rs71475132 | 11 | Unknown         | A | G | 0.162564 | 0.08095 | 3.73E-06 |
| rs10772598 | 12 | APOLD1          | G | A | -0.11719 | 0.06392 | 2.44E-05 |
| rs7979120  | 12 | Unknown         | C | T | -0.05081 | 0.0278  | 2.58E-05 |
| rs35057608 | 15 | CHRNA7          | T | G | 0.104146 | 0.05875 | 4.55E-05 |
| rs11858956 | 15 | Unknown         | T | C | -0.049   | 0.02753 | 4.14E-05 |
| rs12593697 | 15 | FAM169B         | C | G | -0.05134 | 0.02786 | 2.21E-05 |
| rs58821630 | 16 | ZFHX3           | A | G | 0.048442 | 0.02668 | 2.97E-05 |
| rs8058770  | 16 | KIAA0513        | C | A | 0.057286 | 0.03057 | 1.68E-05 |
| rs78338746 | 17 | LOC105371508    | C | G | -0.06505 | 0.0358  | 2.87E-05 |
| rs79049669 | 18 | LOC107985176    | C | G | 0.09691  | 0.05307 | 2.68E-05 |
| rs926600   | 20 | Unknown         | G | A | -0.04842 | 0.02722 | 4.19E-05 |
| rs2075775  | 20 | OGFR            | T | C | 0.049606 | 0.02822 | 4.85E-05 |
| rs2834459  | 21 | ENSG00000272657 | C | T | -0.12889 | 0.06958 | 1.99E-05 |
| rs35939063 | 21 | BACE2           | G | A | 0.110253 | 0.05899 | 1.64E-05 |

CHR, chromosome.

Figure S1. Manhattan and quantile-quantile (QQ) plots for single nucleotide polymorphism (SNP) association with noodle intake

A. Manhattan plot

B. QQ plot

Daily total noodle intake was calculated by summing the daily intakes of instant noodle, noodle soup, Chinese noodle, buckwheat noodle, and starch noodle. The cutoff of total noodle was 130 g/day. Genetic variants of the noodle intake were determined with a genome-wide association study (GWAS).

A.

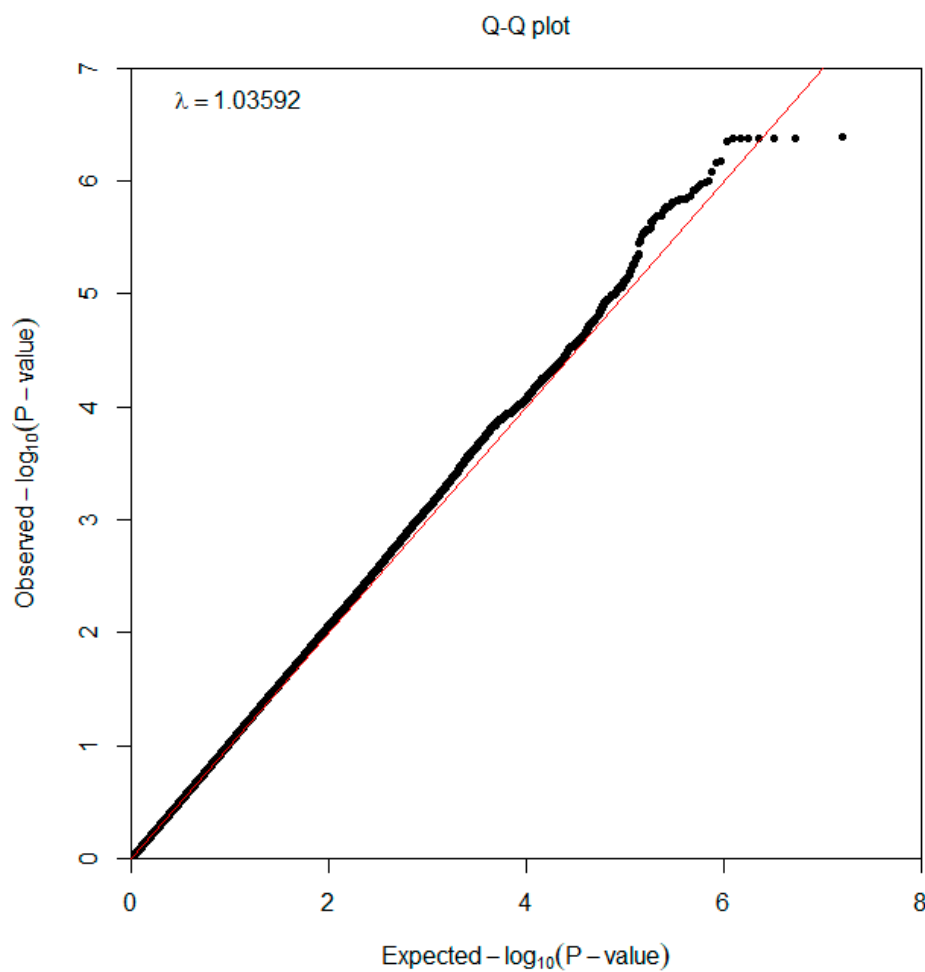

B.

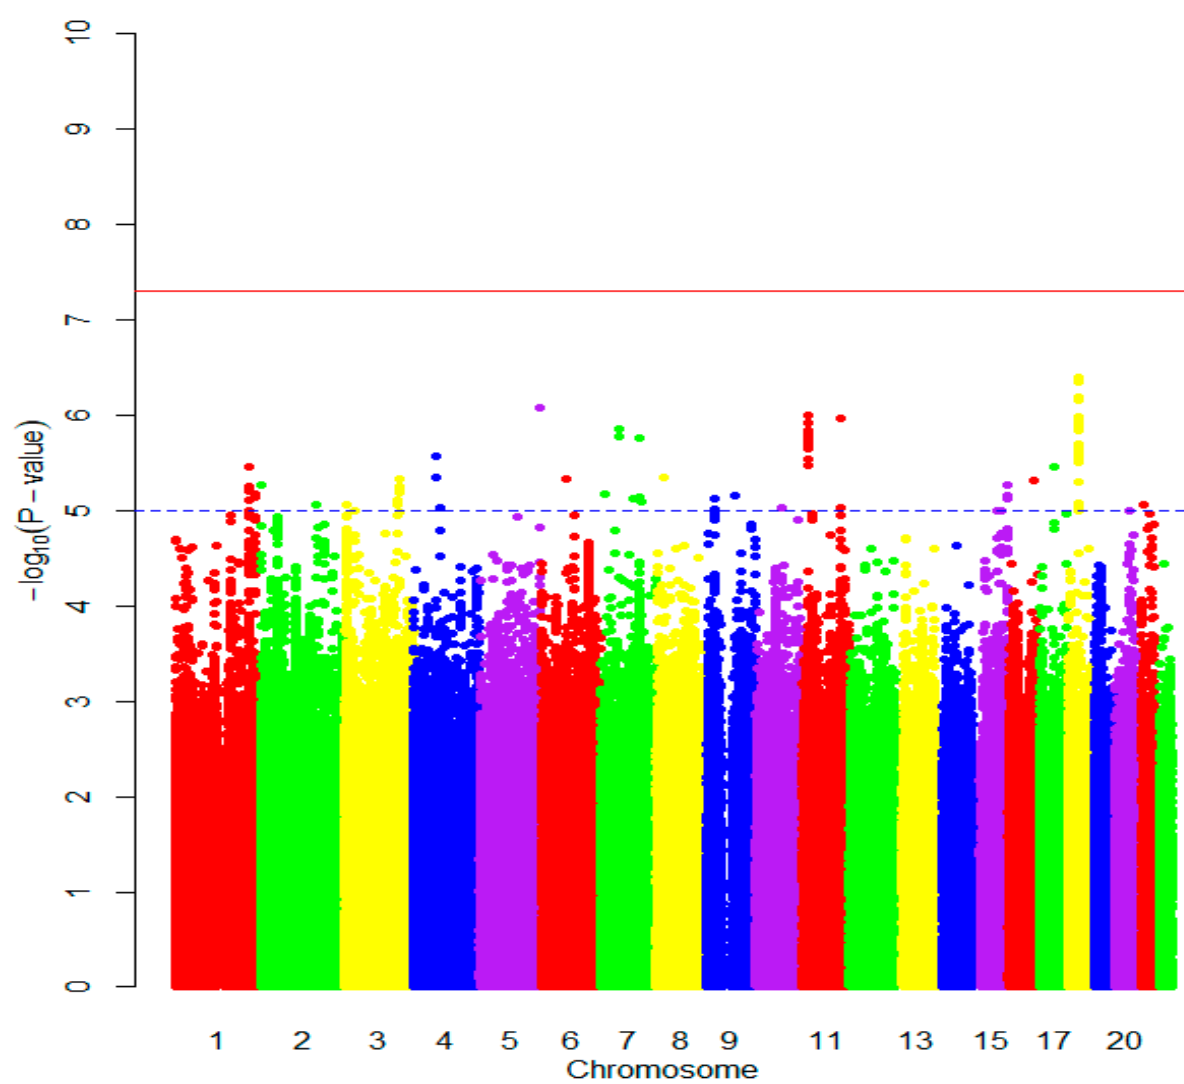

Supplement: s1 [file s1]
